# Supplementary material
Source: publisher figshare collection journal article supplement (https://plos.figshare.com/articles/dataset/_/3134647)

# Western Caucasian face-name learning

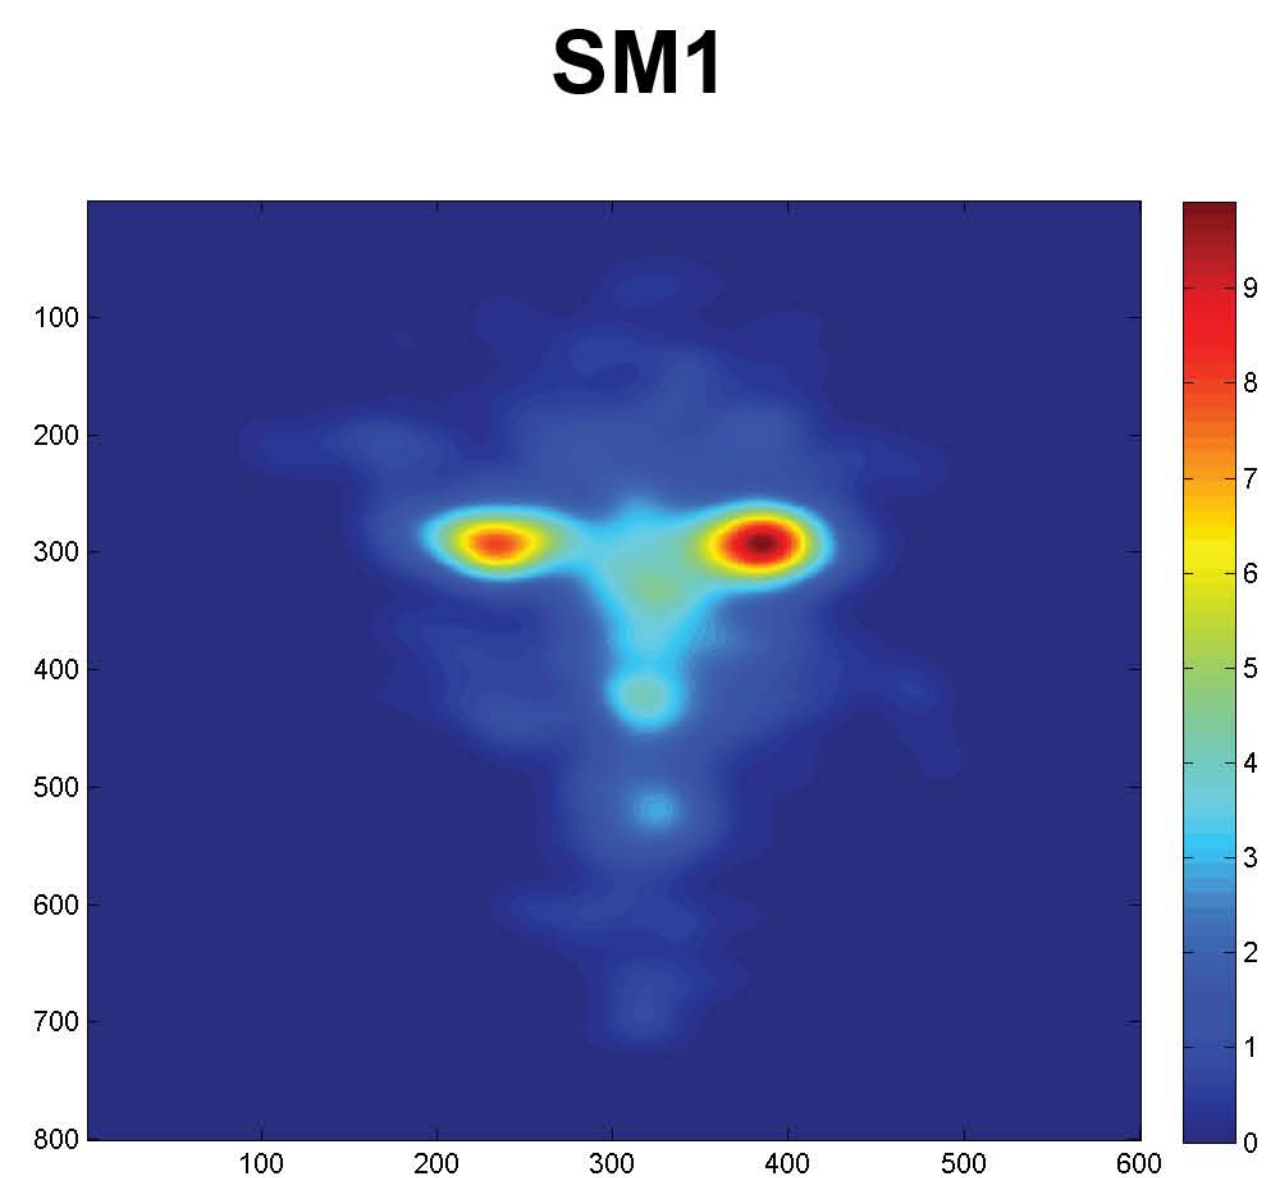

# Eastern Asian face-name learning

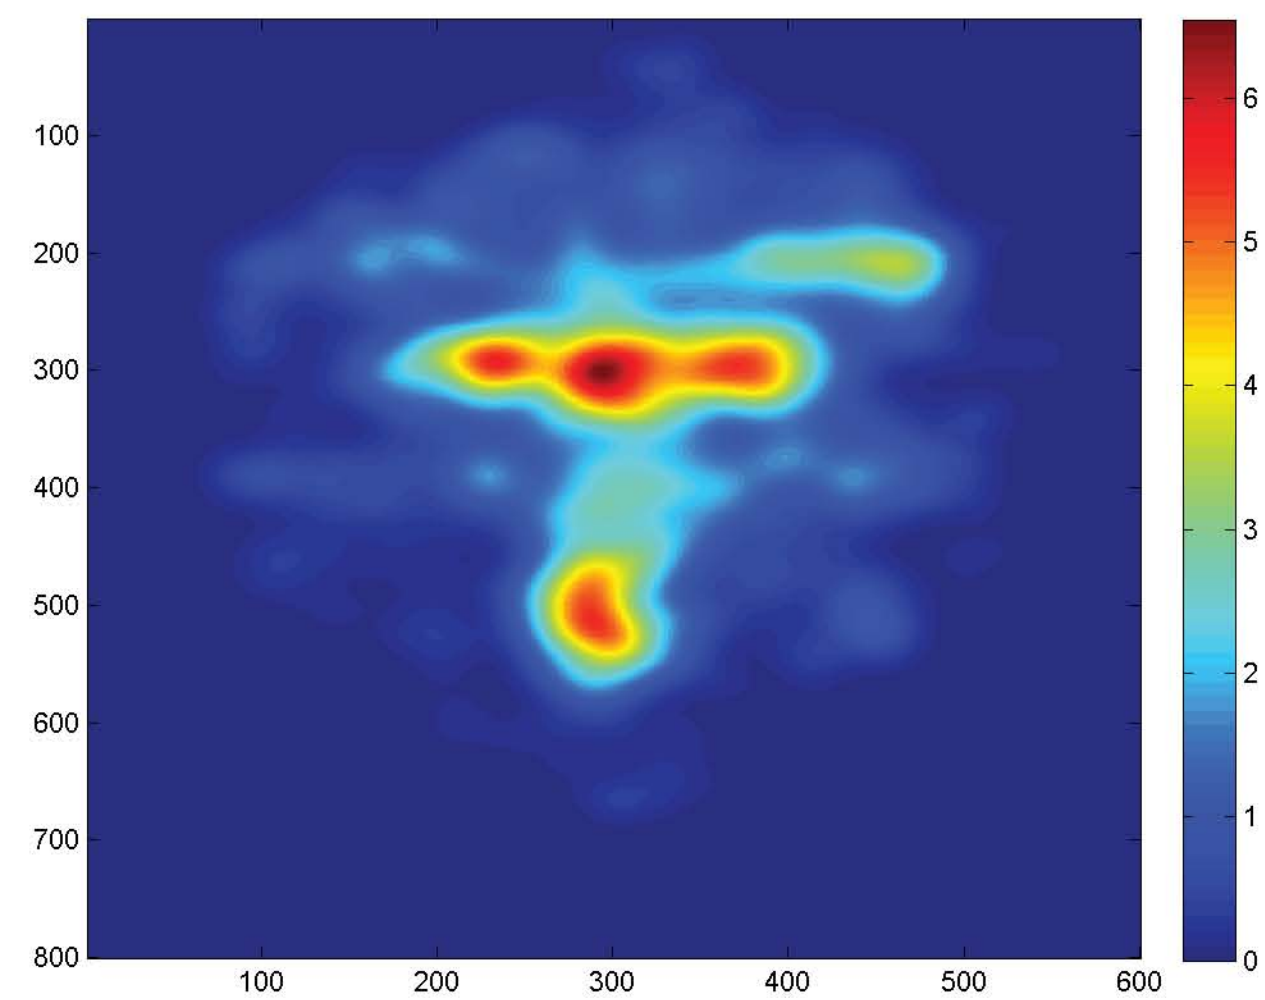

SM1

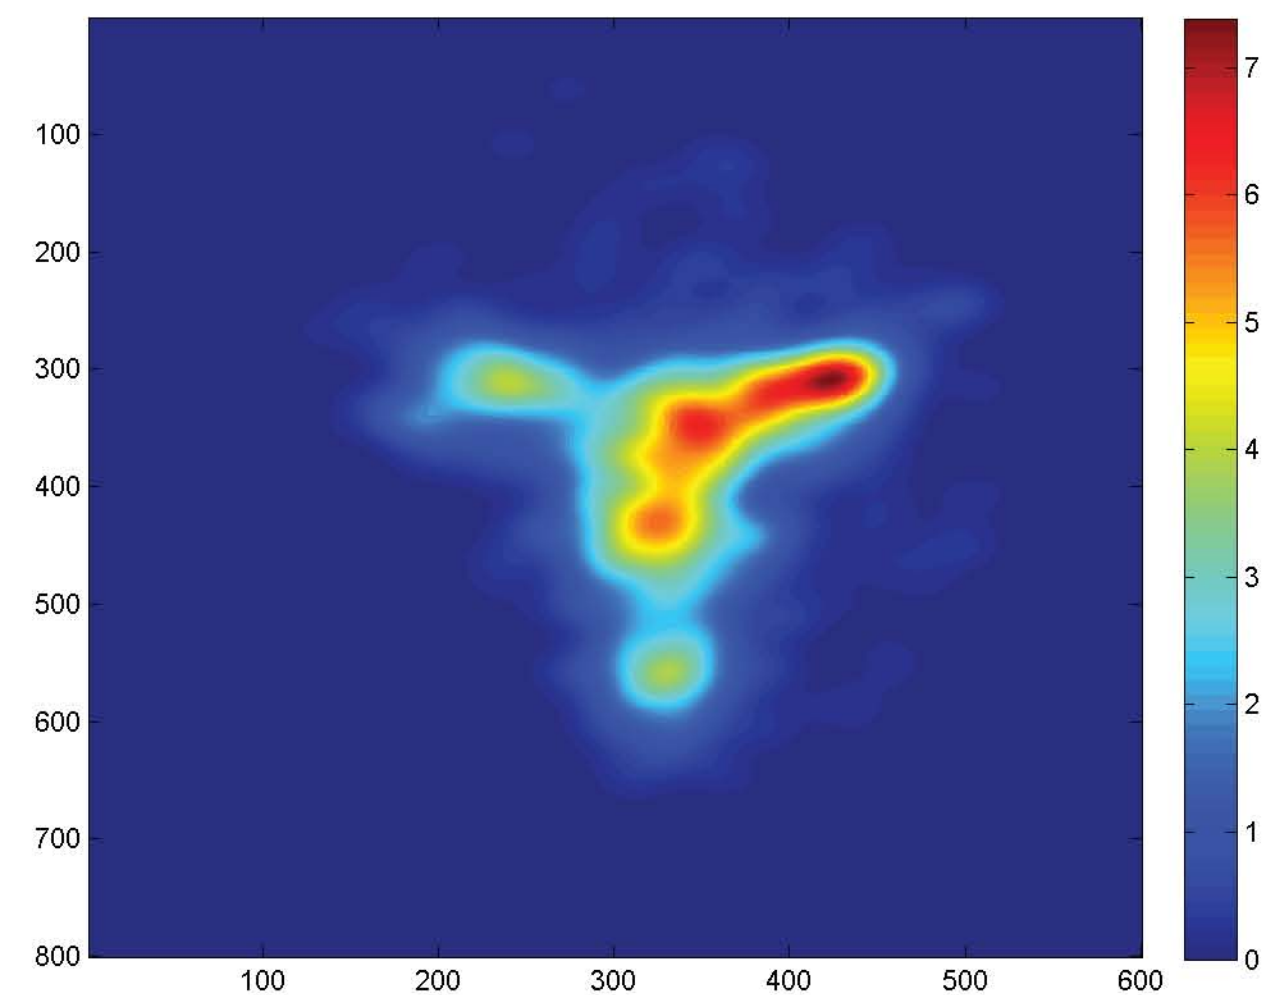

## SM2



## Controls

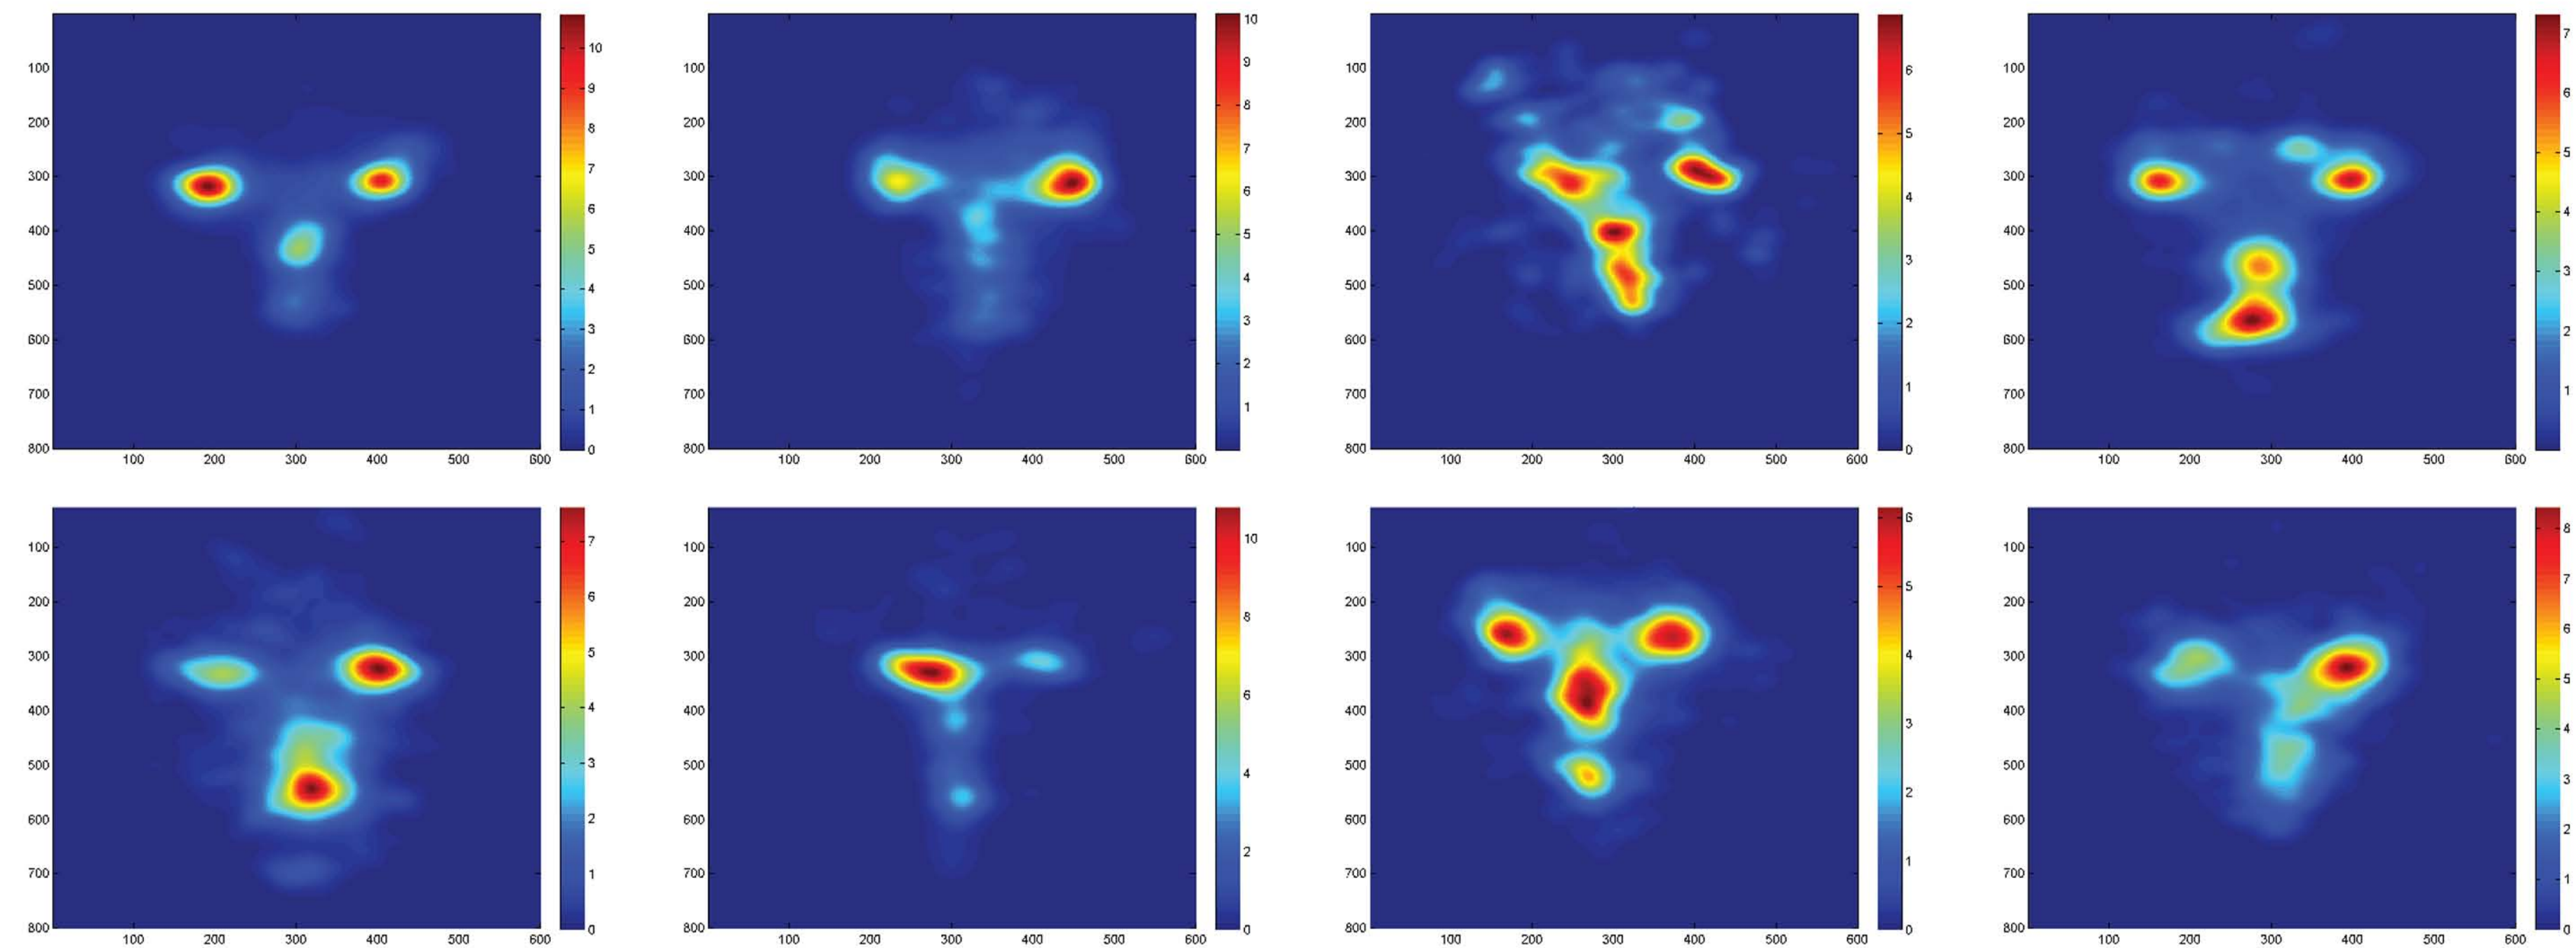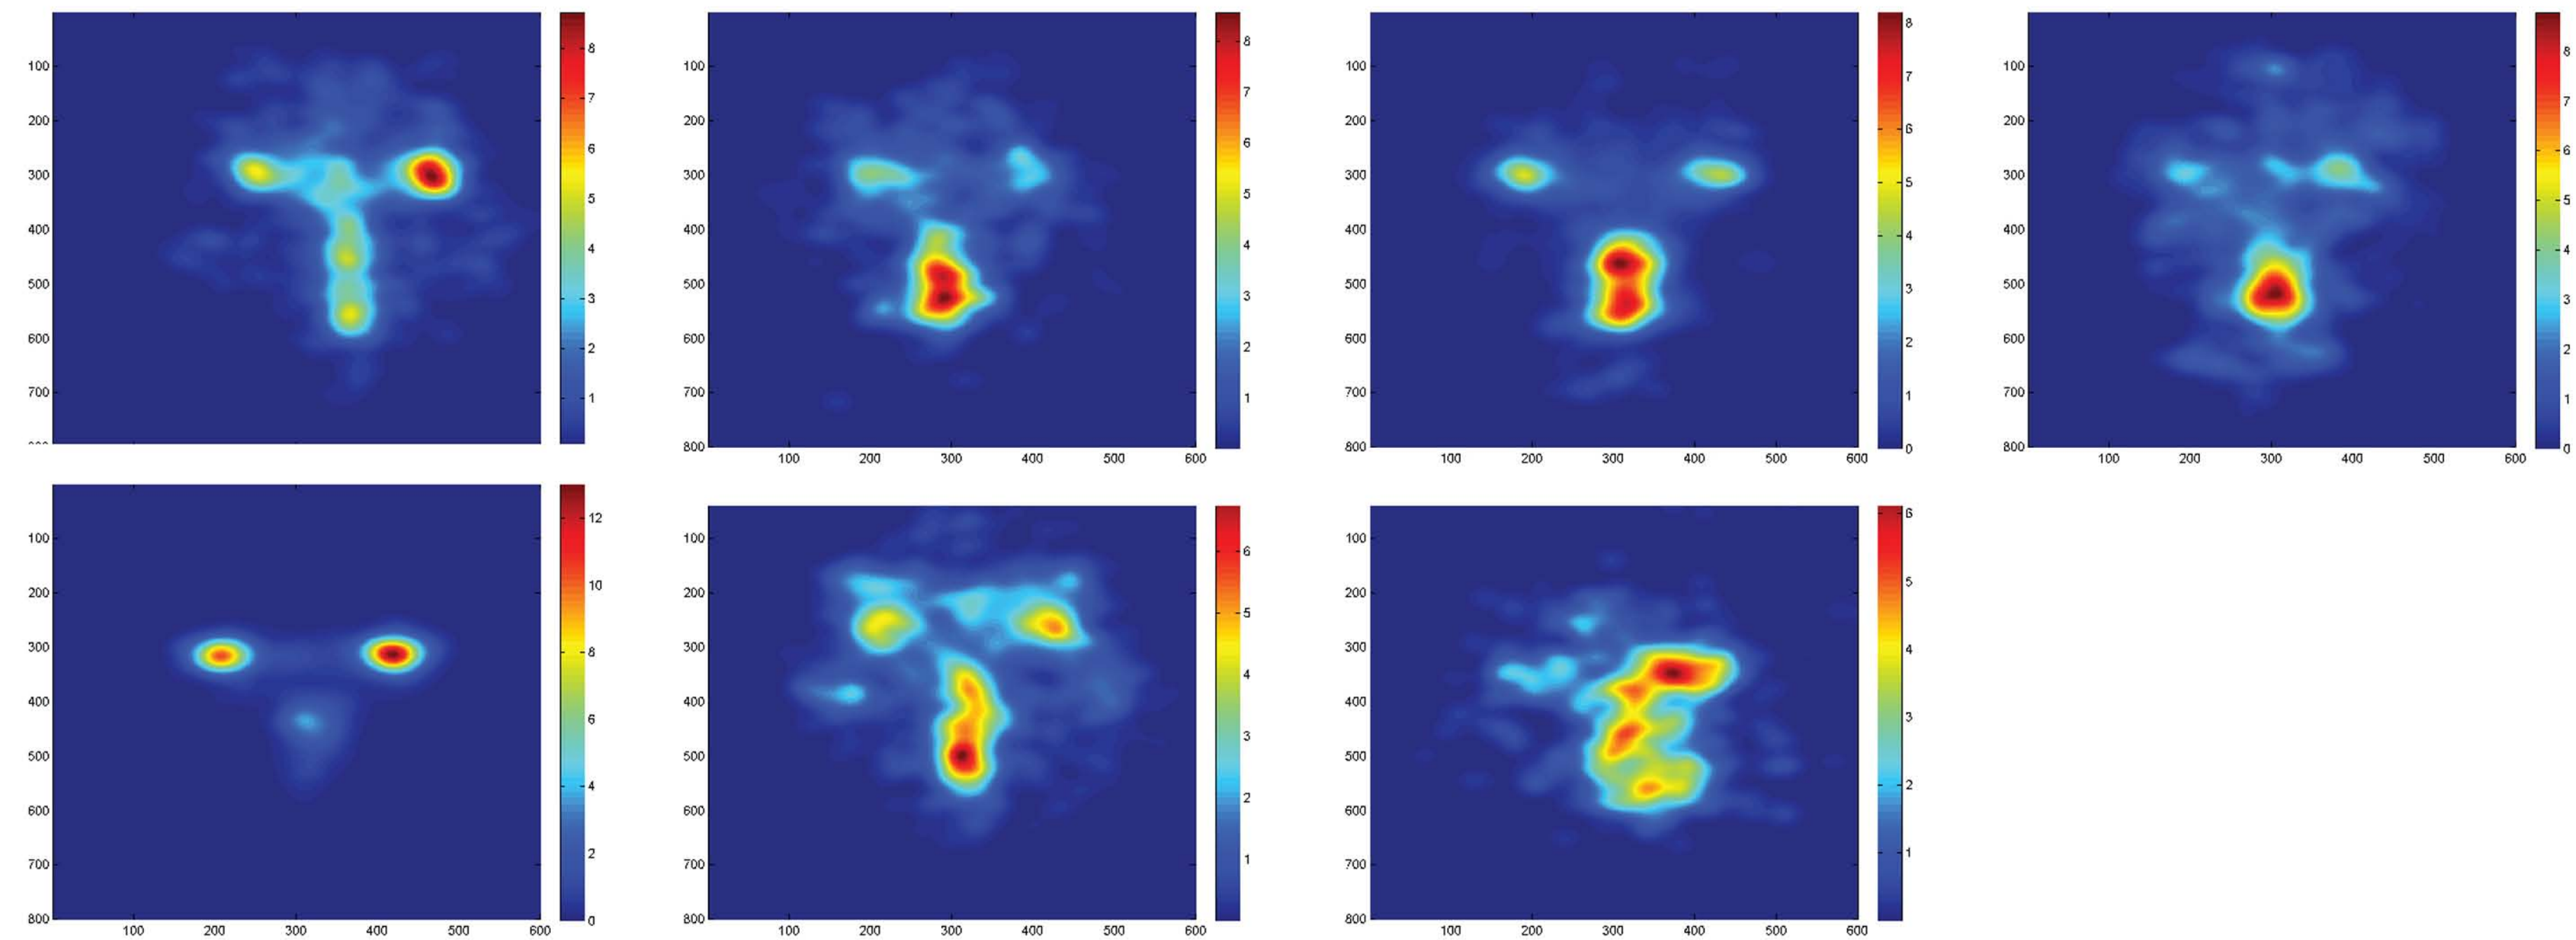

Supplement: Supplementary file [file 1]
