# Supplementary material
Source: publisher figshare collection journal article supplement (https://plos.figshare.com/articles/dataset/_/3134647)

SM1

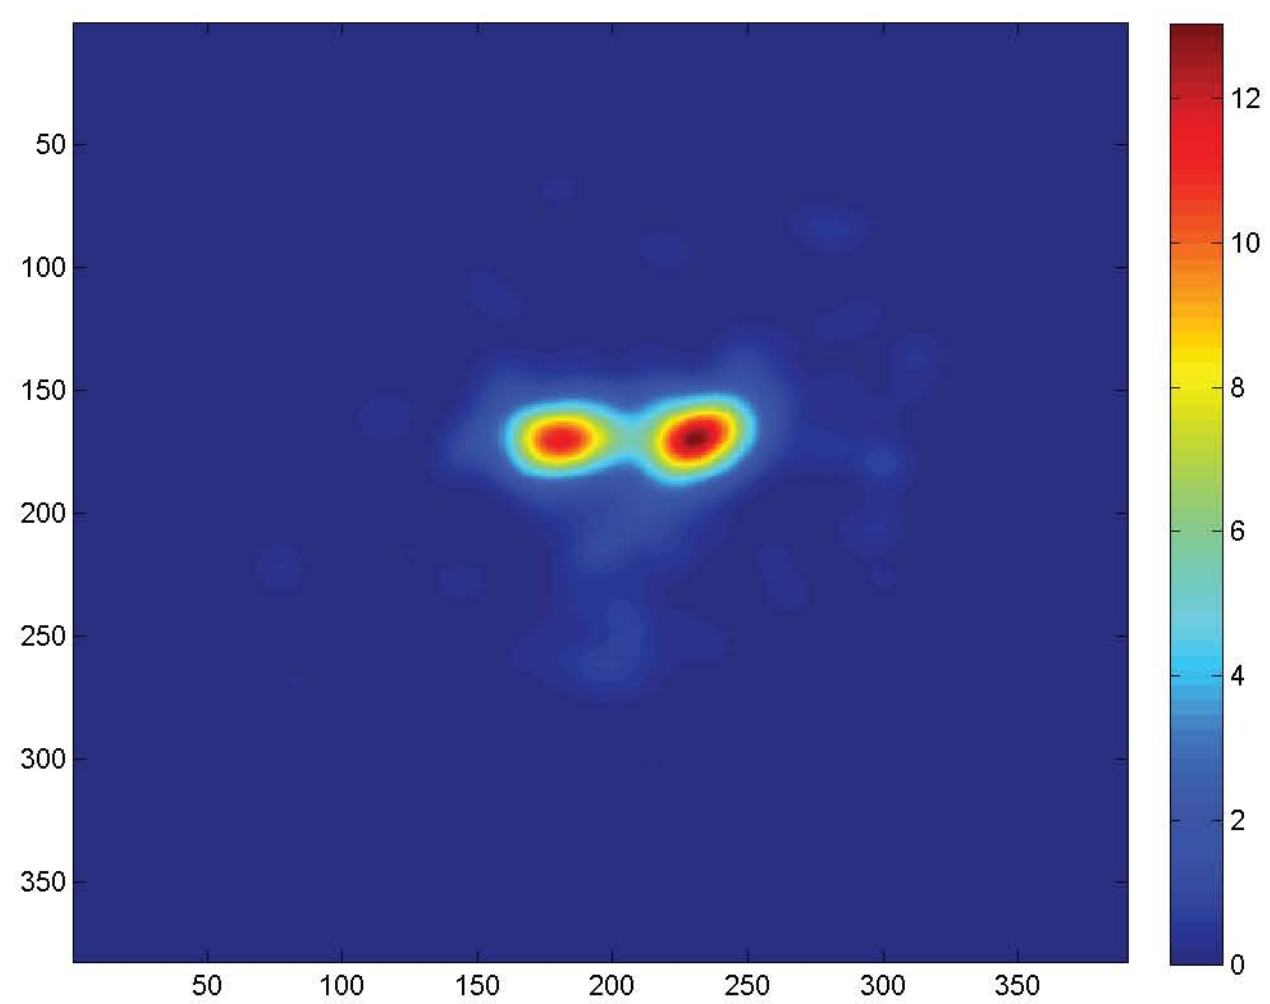

SM2

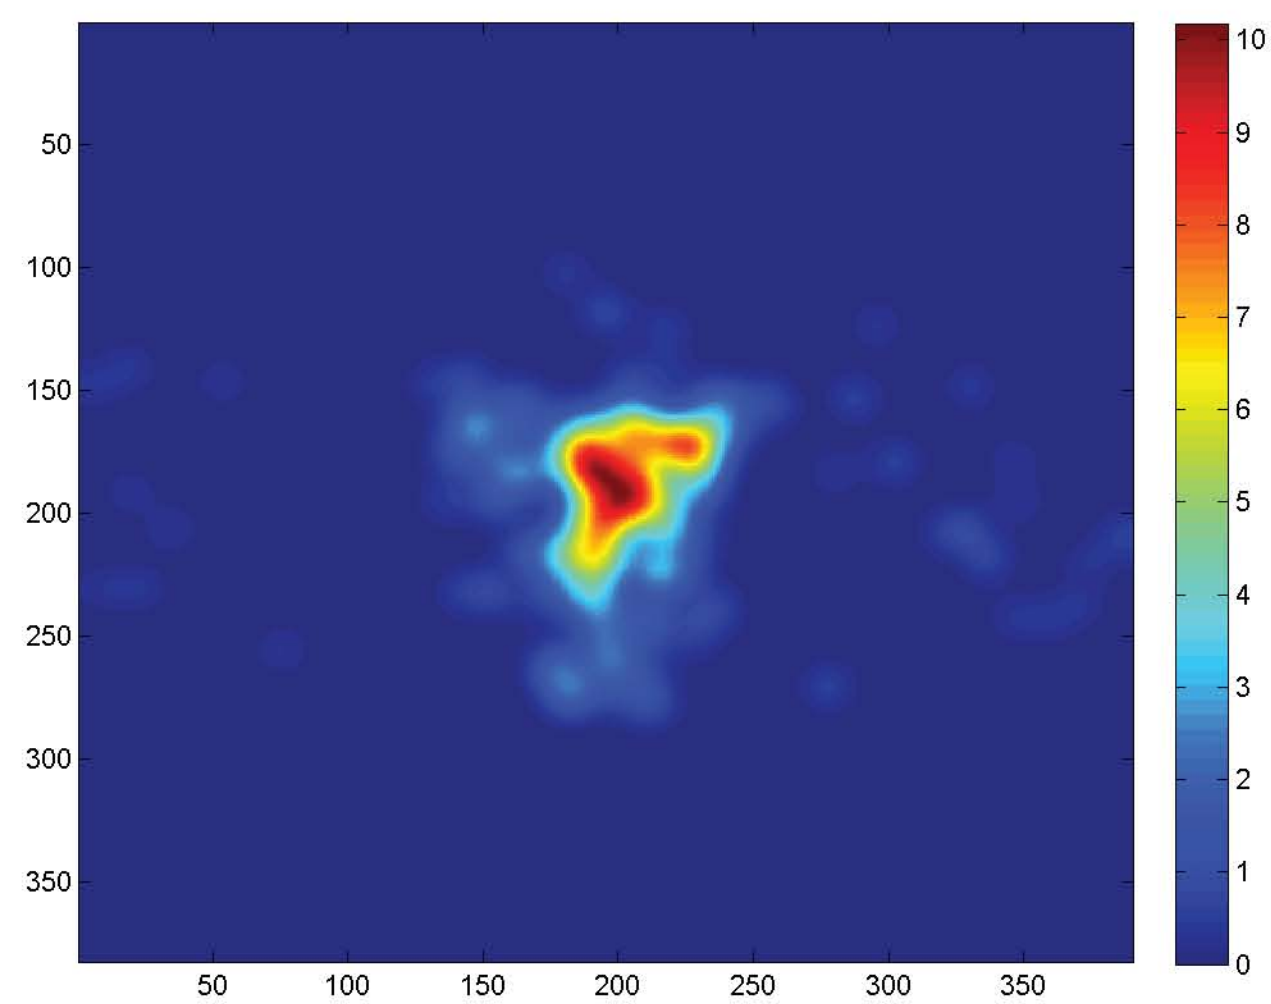

Controls

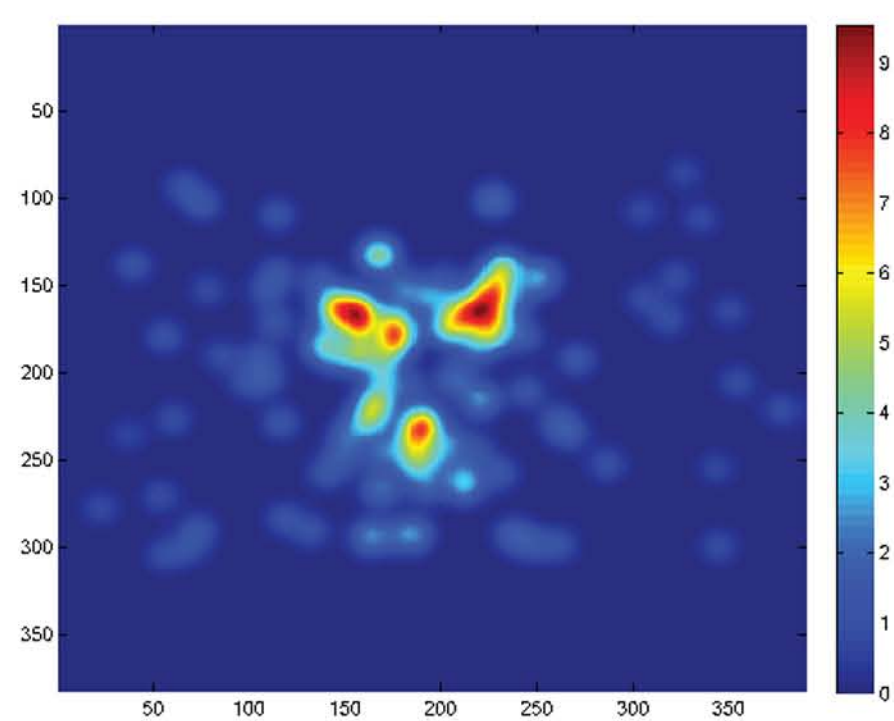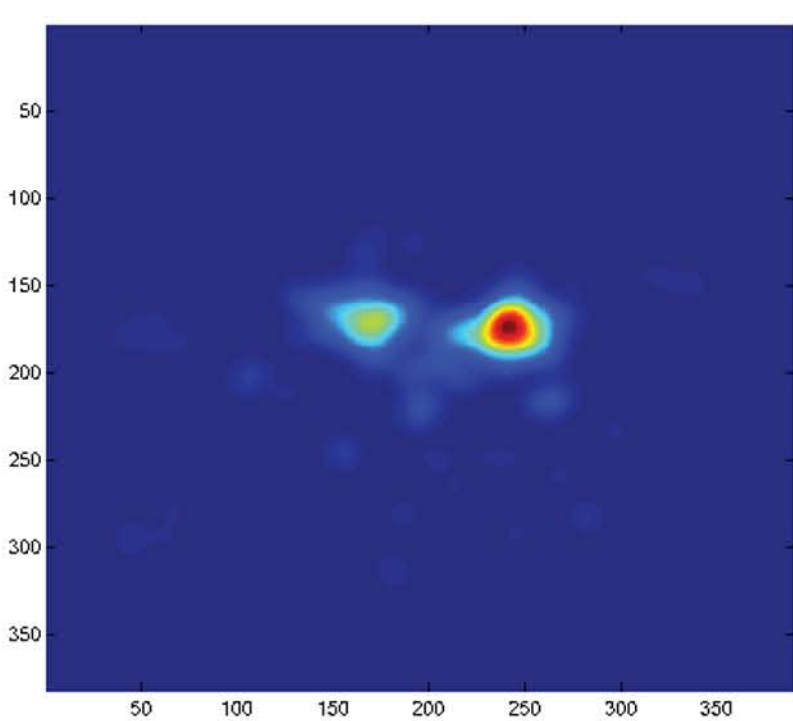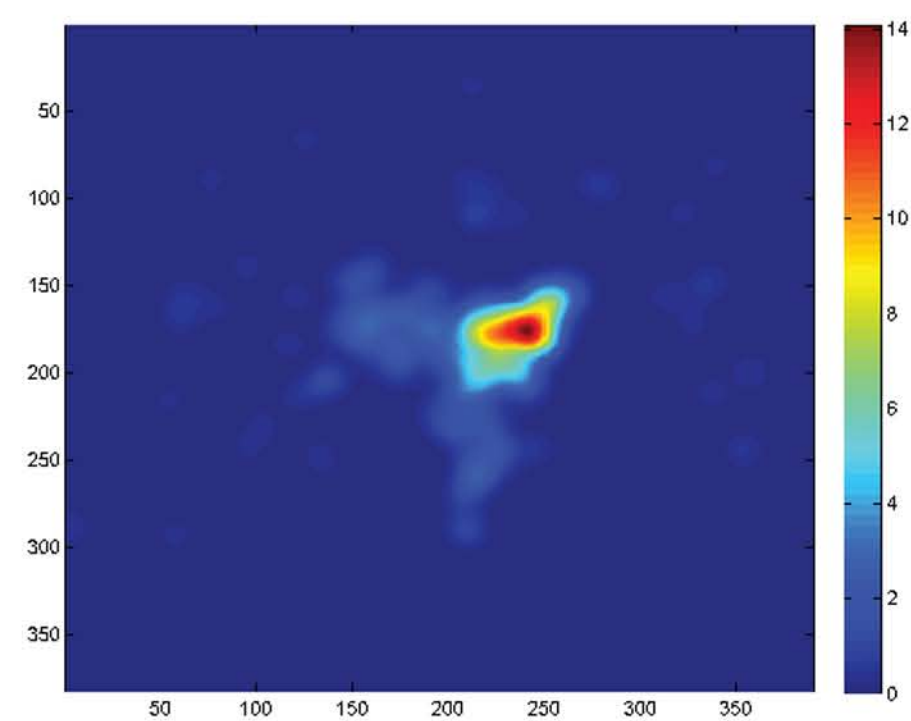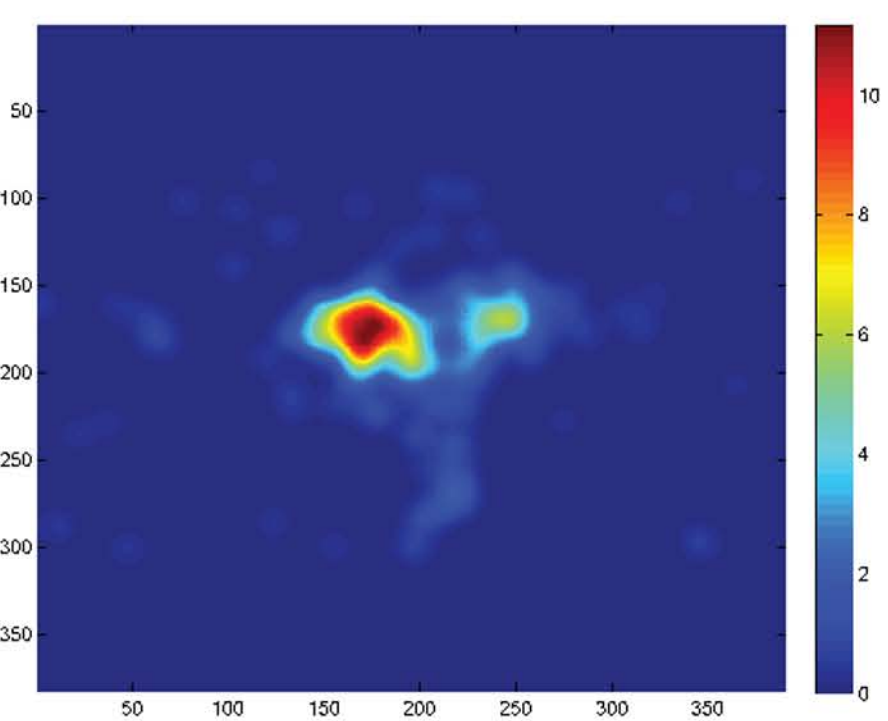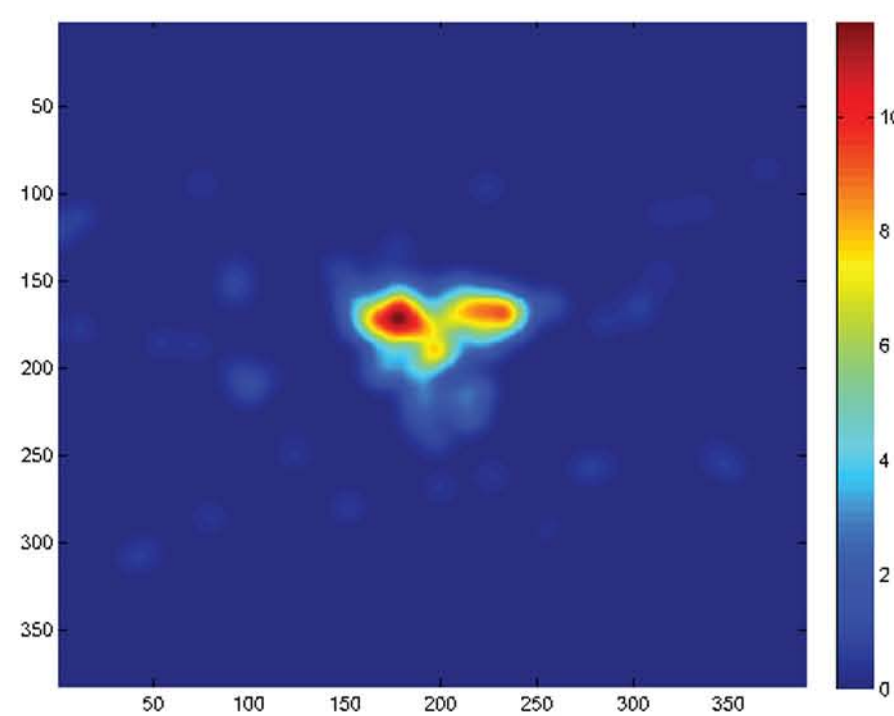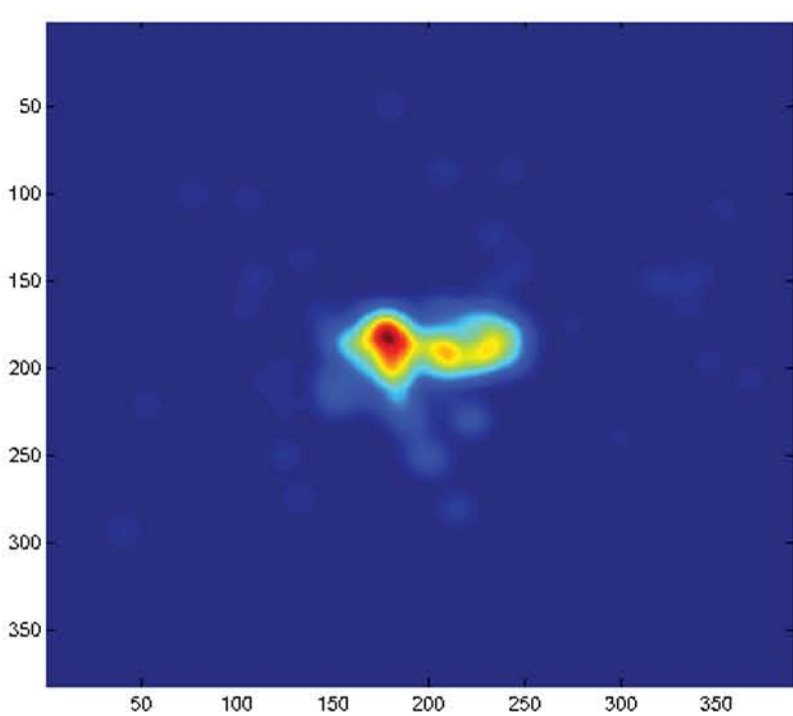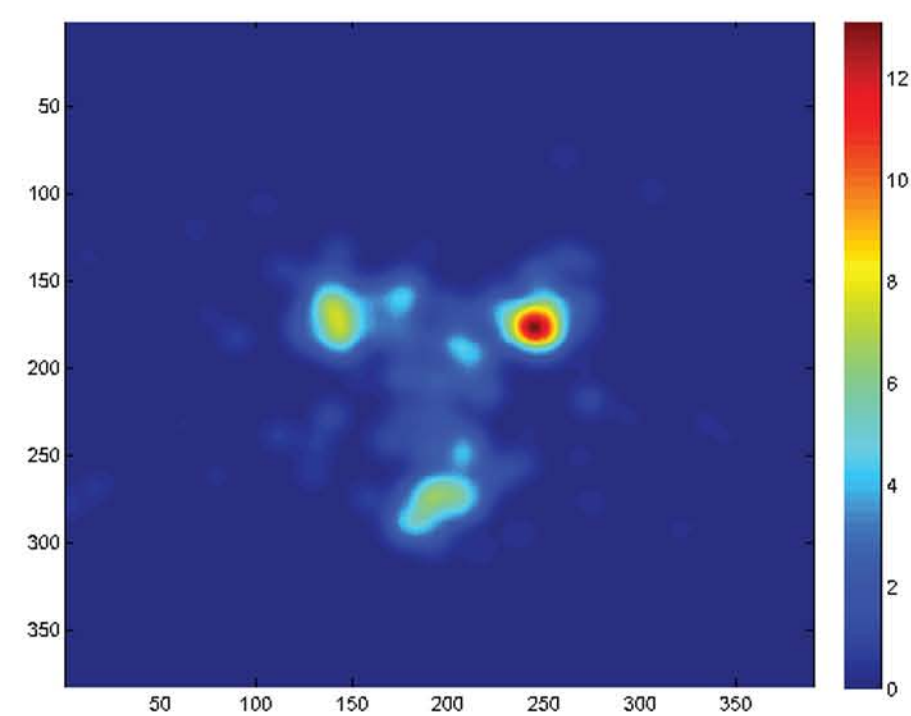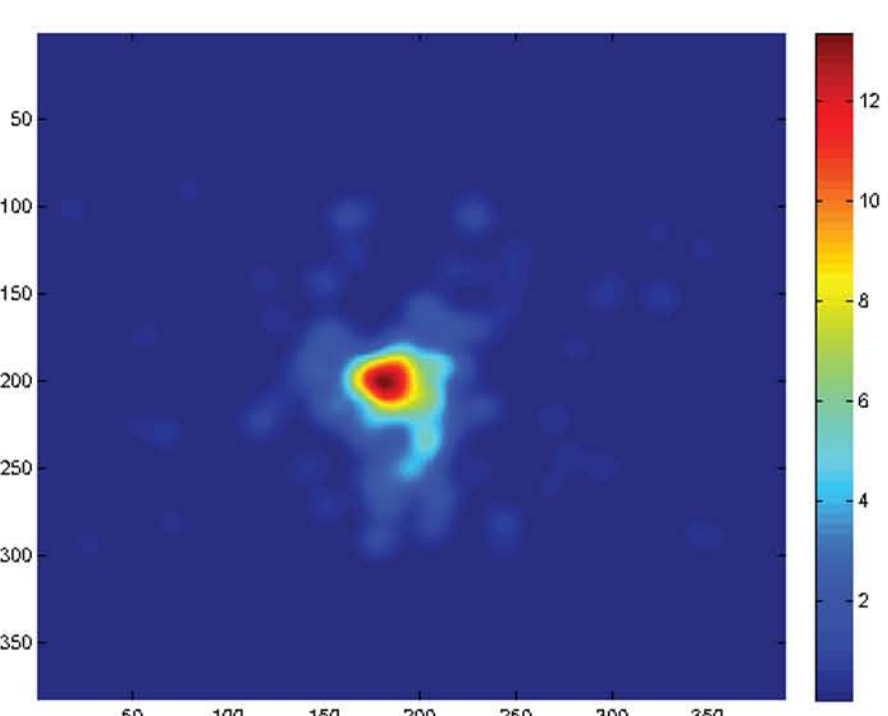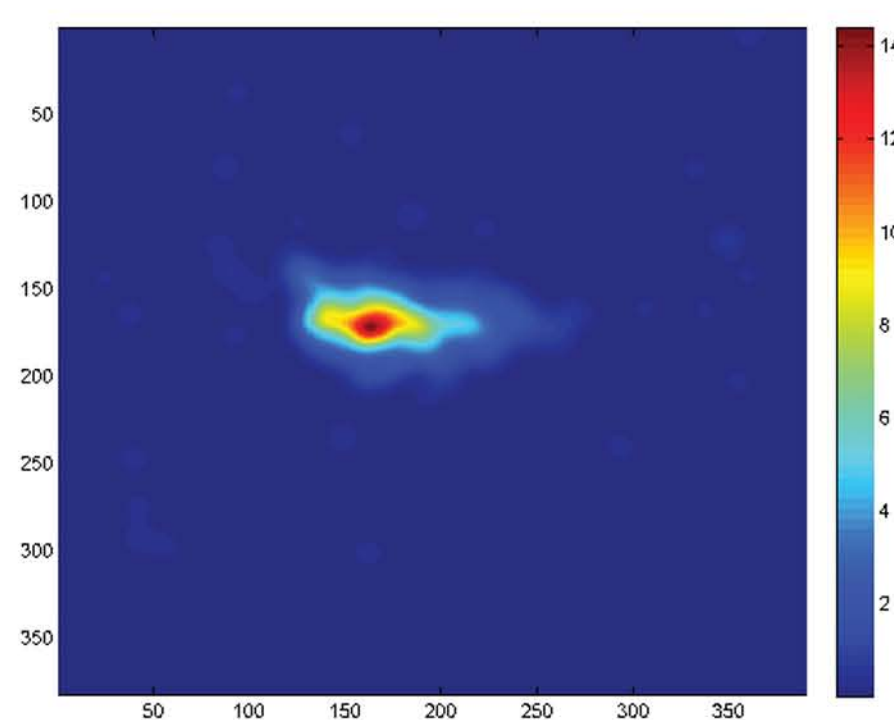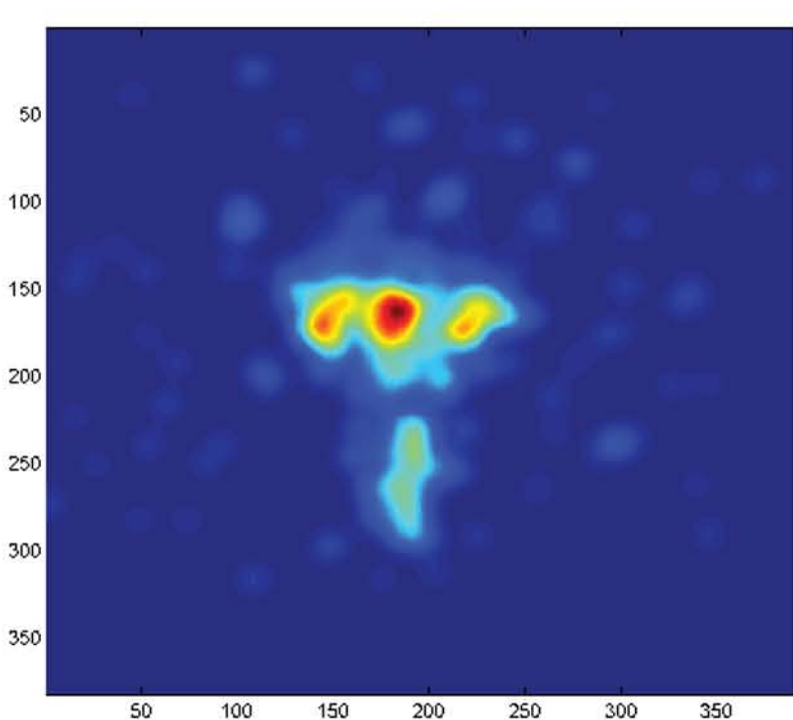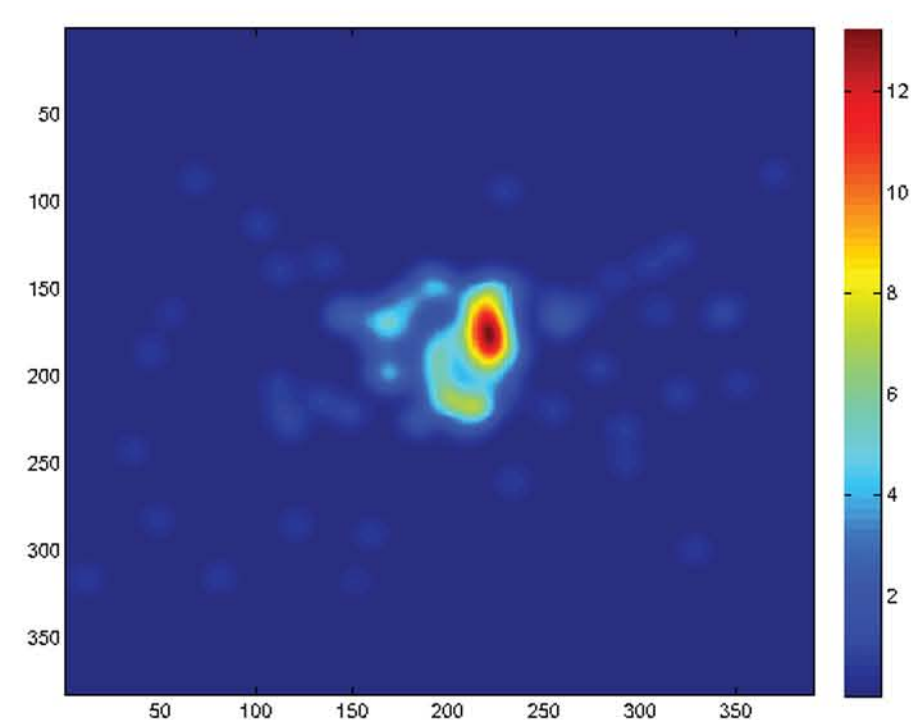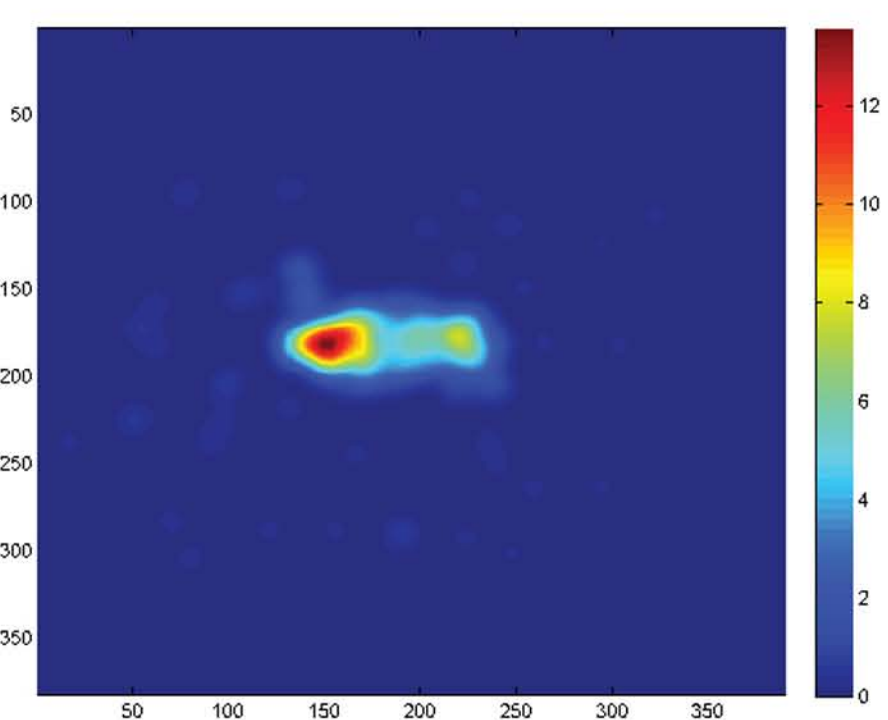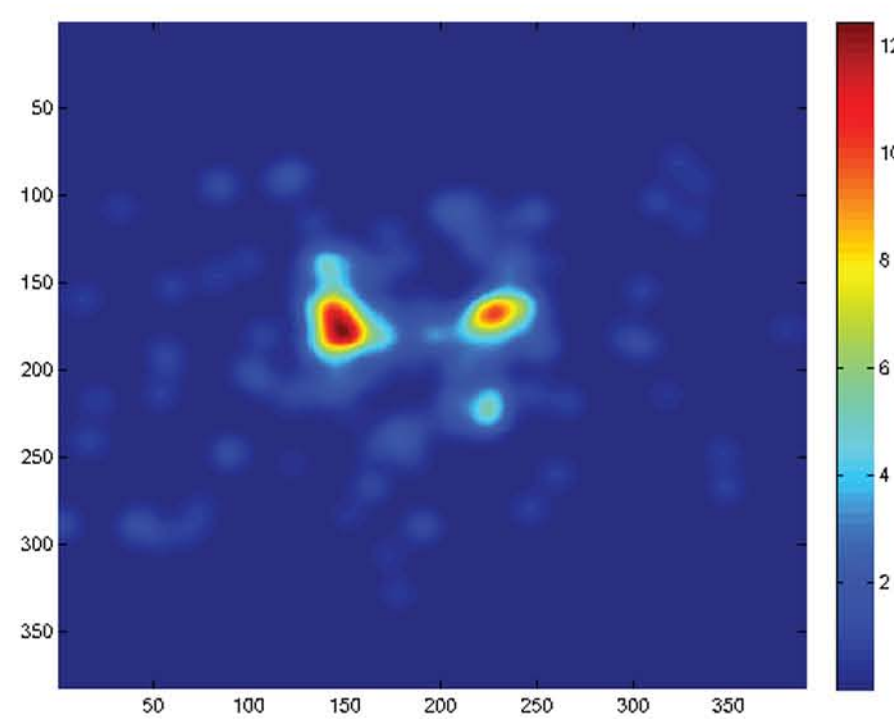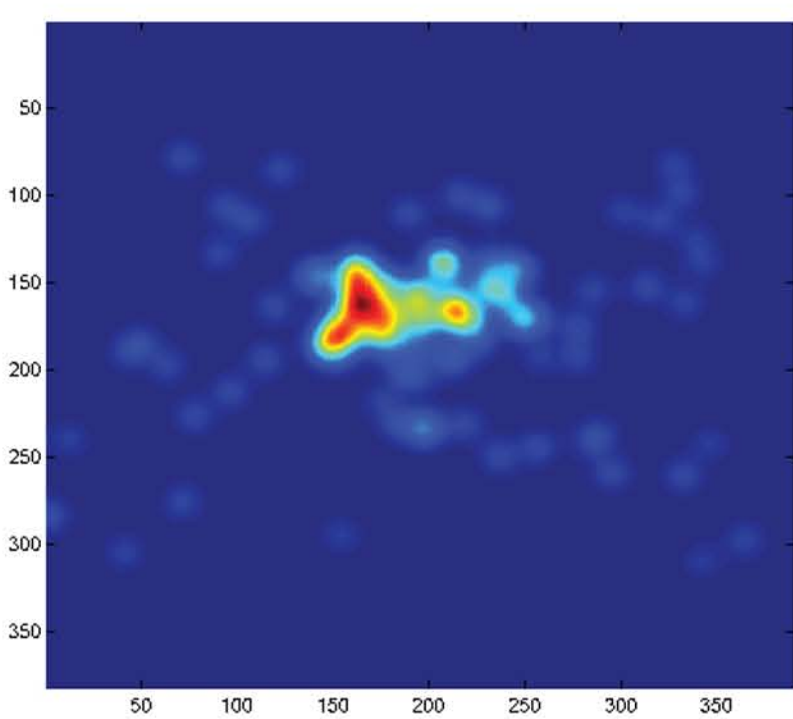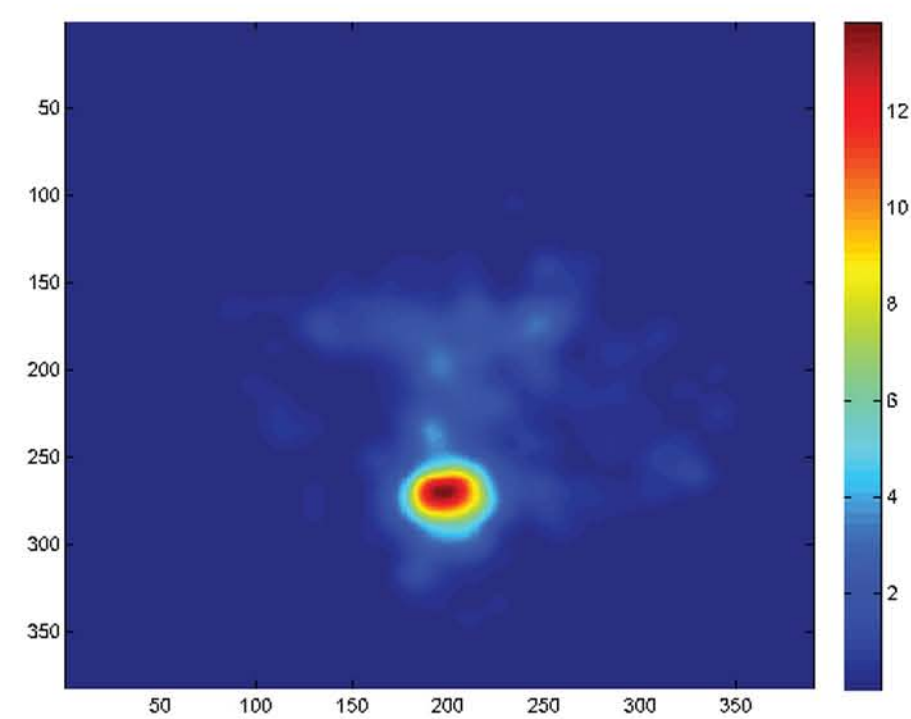

Supplement: Supplementary file [file 1]
